# Supplementary material for: Effect of Caffeine and Other Methylxanthines on Aβ-Homeostasis in SH-SY5Y Cells
Source: Biomolecules. 2019 Nov 2;9(11):689. doi: 10.3390/biom9110689 (PMC6920871; doi:10.3390/biom9110689)
Supplement: Supplementary file 1 [file biomolecules-09-00689-s001.pdf]

# Supplemental material

Table 1a. Cytotoxicity by LDH release

| MTX             | mean<br>difference to<br>control [%] |
|-----------------|--------------------------------------|
| caffeine        | -0.54                                |
| theophylline    | -0.28                                |
| pentoxifylline  | -0.06                                |
| theobromine     | 1.4                                  |
| propentofylline | 3.78                                 |

Table 1b. Cell proliferation by XTT release

| MTX             | mean<br>difference to<br>control [%] |
|-----------------|--------------------------------------|
| caffeine        | 3.8                                  |
| theophylline    | -3.27                                |
| pentoxifylline  | 2.34                                 |
| theobromine     | 0.83                                 |
| propentofylline | -1.91                                |

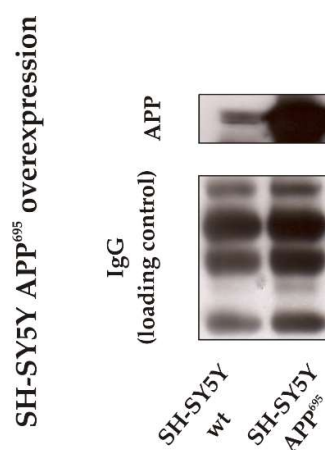

Supplemental Figure 1. Expression of APP<sup>695</sup> in SH-SY5Y wt and APP<sup>695</sup> transfected cells

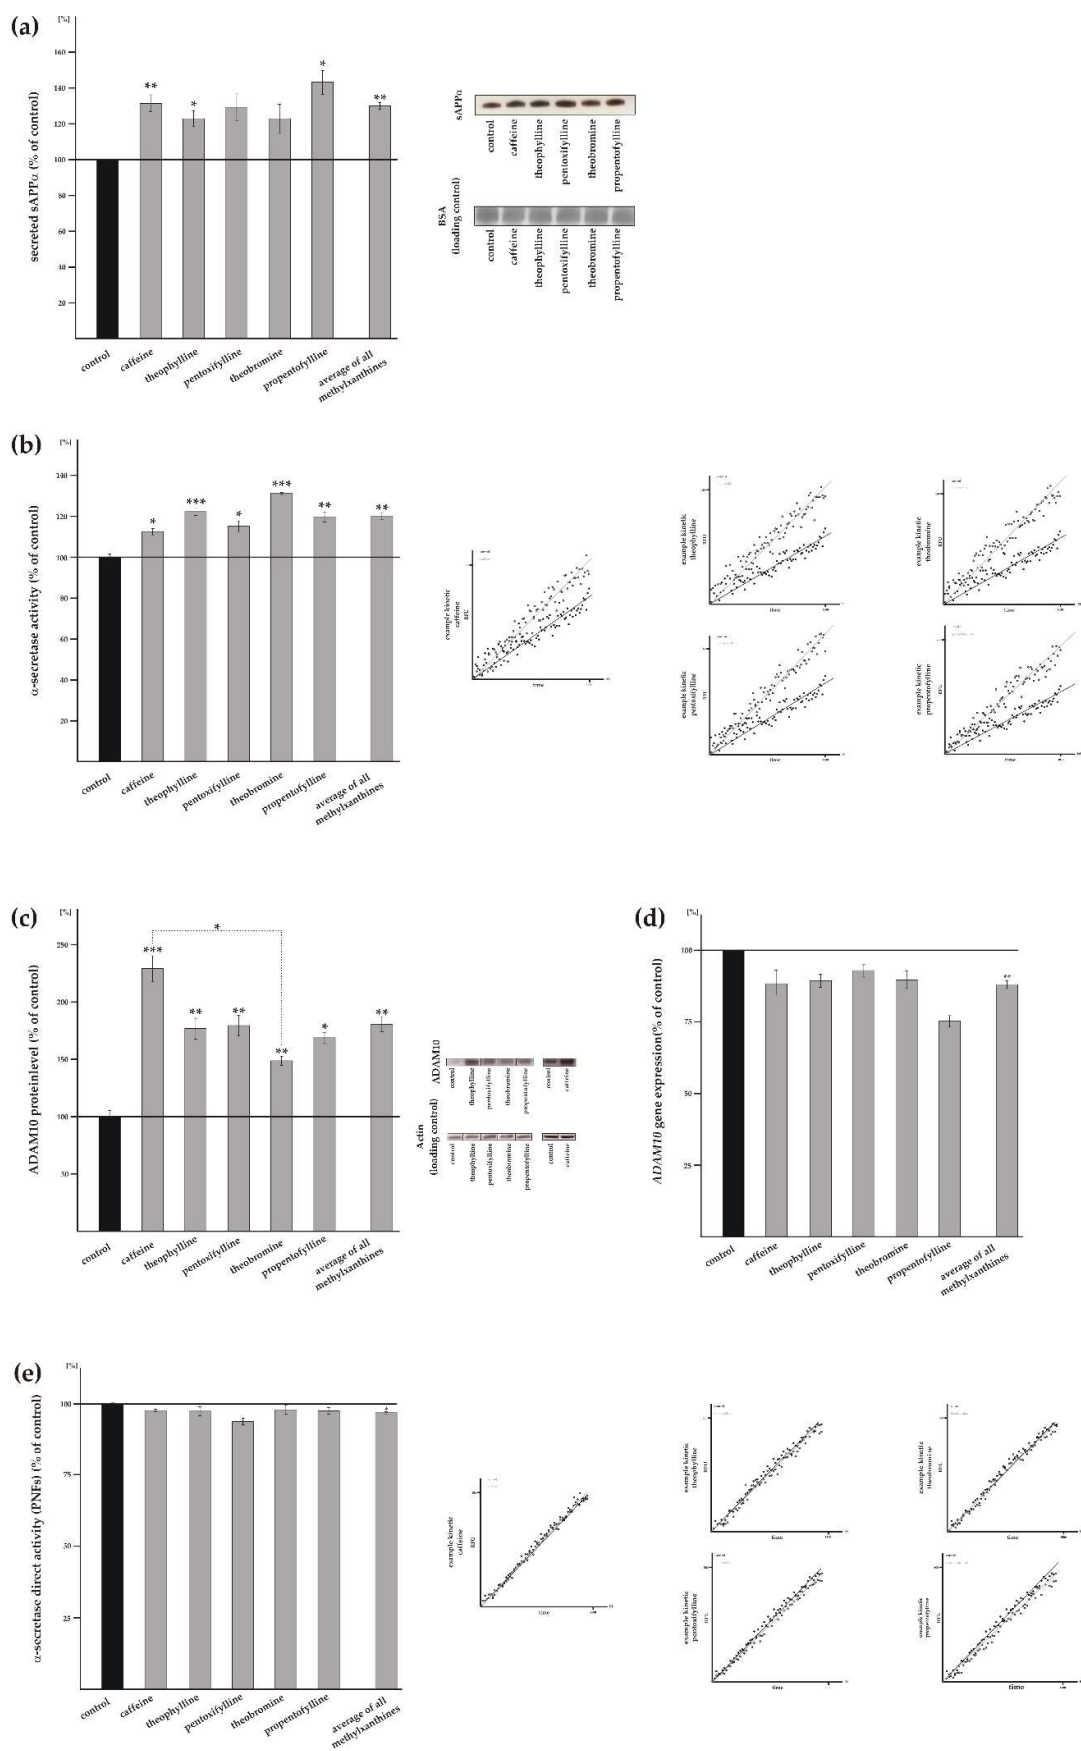

**Supplemental Figure 2. Effects of caffeine, theophylline, pentoxifylline, theobromine and propentofylline on  $\alpha$ -secretase.** (a) Protein amounts of secreted soluble sAPP $\alpha$  of treated SH-SY5Y cells compared to untreated control cells ( $n \geq 9$ ). Representative WBs including load control are shown on the right. (b) Activity of  $\alpha$ -secretase in living SH-SY5Y cells after MTXs treatment ( $n \geq 4$ ). Representative kinetics are shown on the right side. (c) Protein level of ADAM10 ( $n \geq 4$ ). Representative WBs including load control are shown on the right. (d) *ADAM10* gene expression ( $n \geq 10$ ). (e)  $\alpha$ -secretase activity in post nuclear fractions of incubated SH-SY5Y cells ( $n \geq 4$ ) and resulting, representative kinetics after MTXs incubation. Error bars represent the standard error of the mean. Asterisks show the statistical significance calculated by unpaired Student's t test (\*  $p \leq .05$ ; \*\*  $p \leq .01$ ; \*\*\*  $p \leq .001$ ).

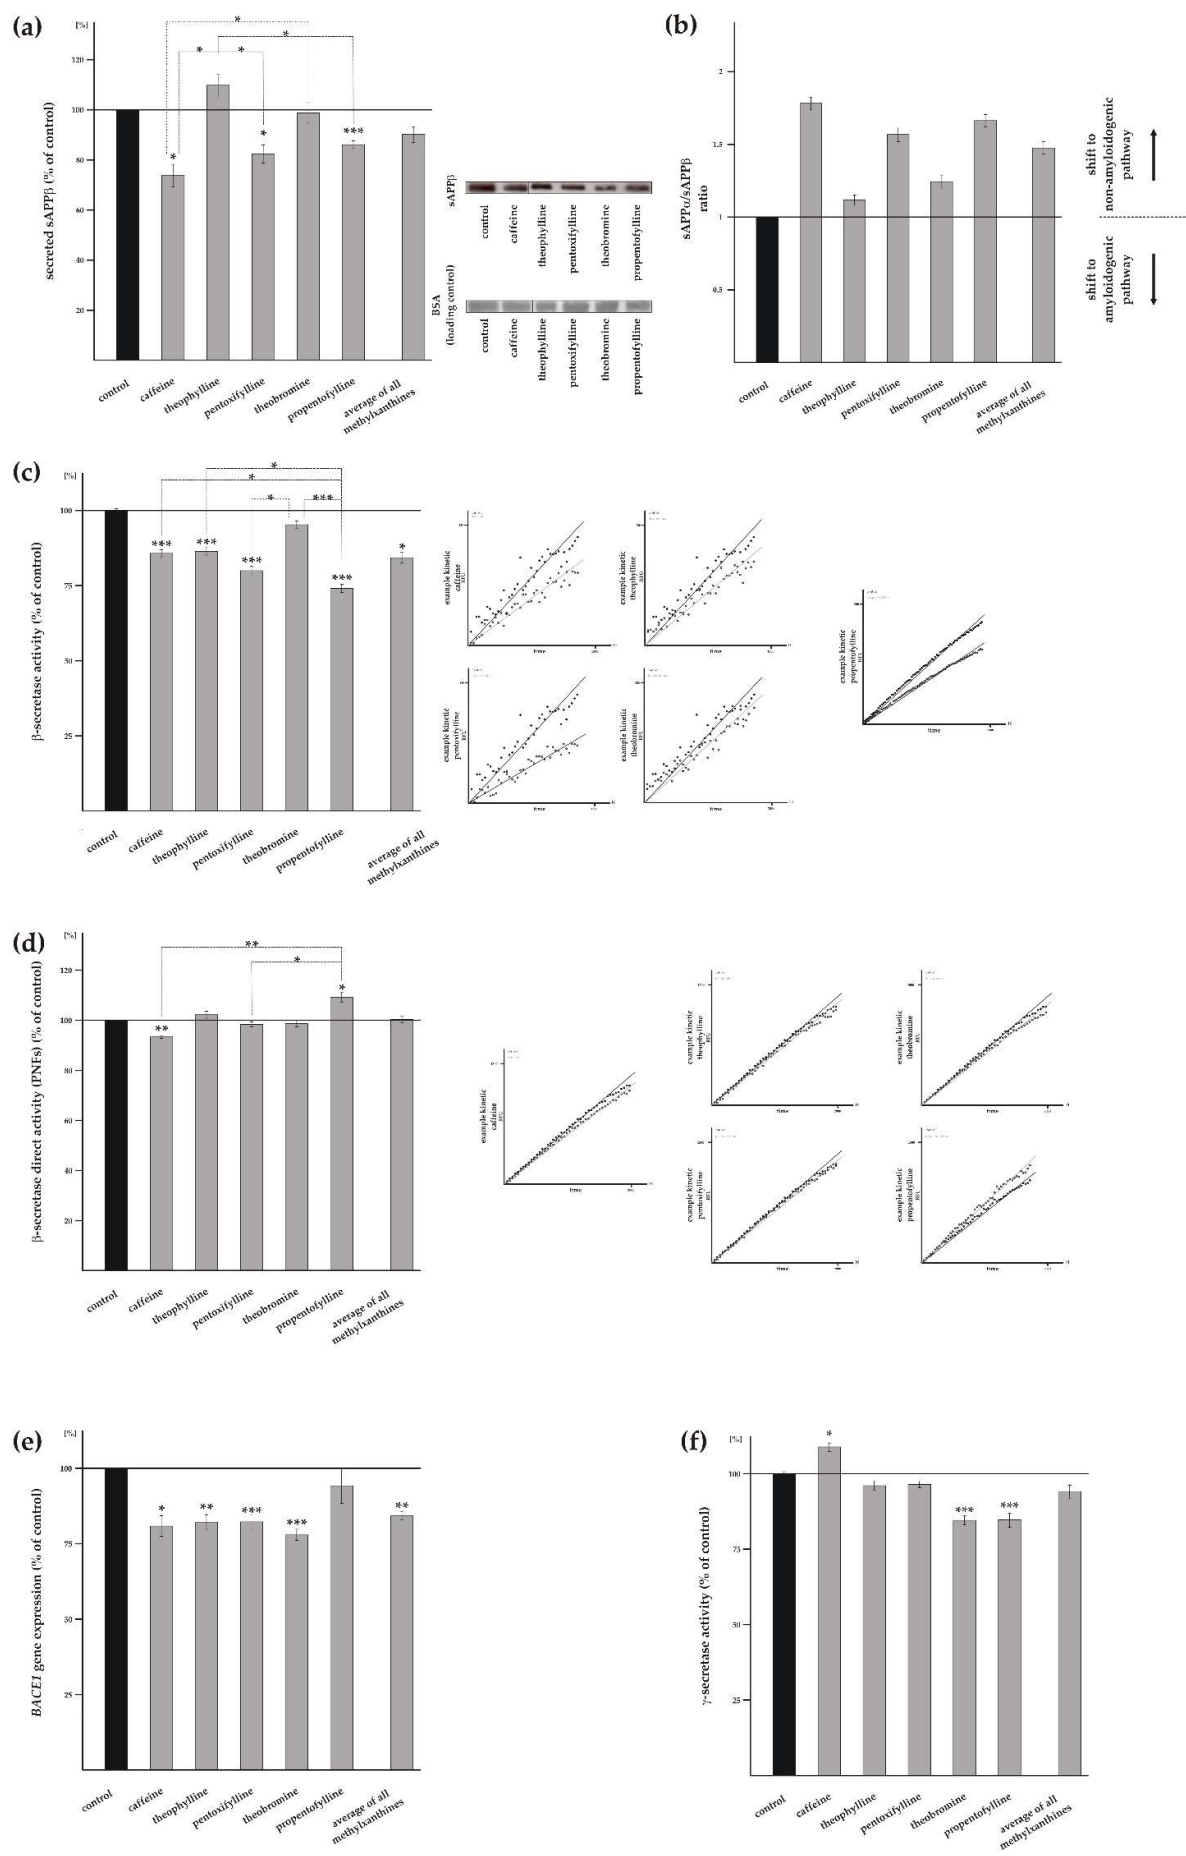

**Supplemental Figure 3. Influence of MTXs on amyloidogenic APP processing.** (a) Protein level of sAPP $\beta$  of treated SH-SY5Y APP<sup>695</sup> cells ( $n \geq 13$ ). Representative WBs including load control are shown on the right. (b) sAPP $\alpha$ /sAPP $\beta$  ratios. (c)  $\beta$ -secretase activity ( $n \geq 19$ ). Representative kinetics for each analyzed MTX are shown on the right. (d) Analysis of the activity of  $\beta$ -secretase in post nuclear fractions from SH-SY5Y cells ( $n \geq 6$ ). Example kinetics are illustrated on the right side. (e) Level of *BACE1* mRNA ( $n \geq 10$ ). (f) Activity of the  $\gamma$ -secretase ( $n \geq 25$ ). Error bars represent the standard error of the mean. Asterisks show the statistical significance calculated by unpaired Student's t test (\*  $p \leq .05$ ; \*\*  $p \leq .01$ ; \*\*\*  $p \leq .001$ ).

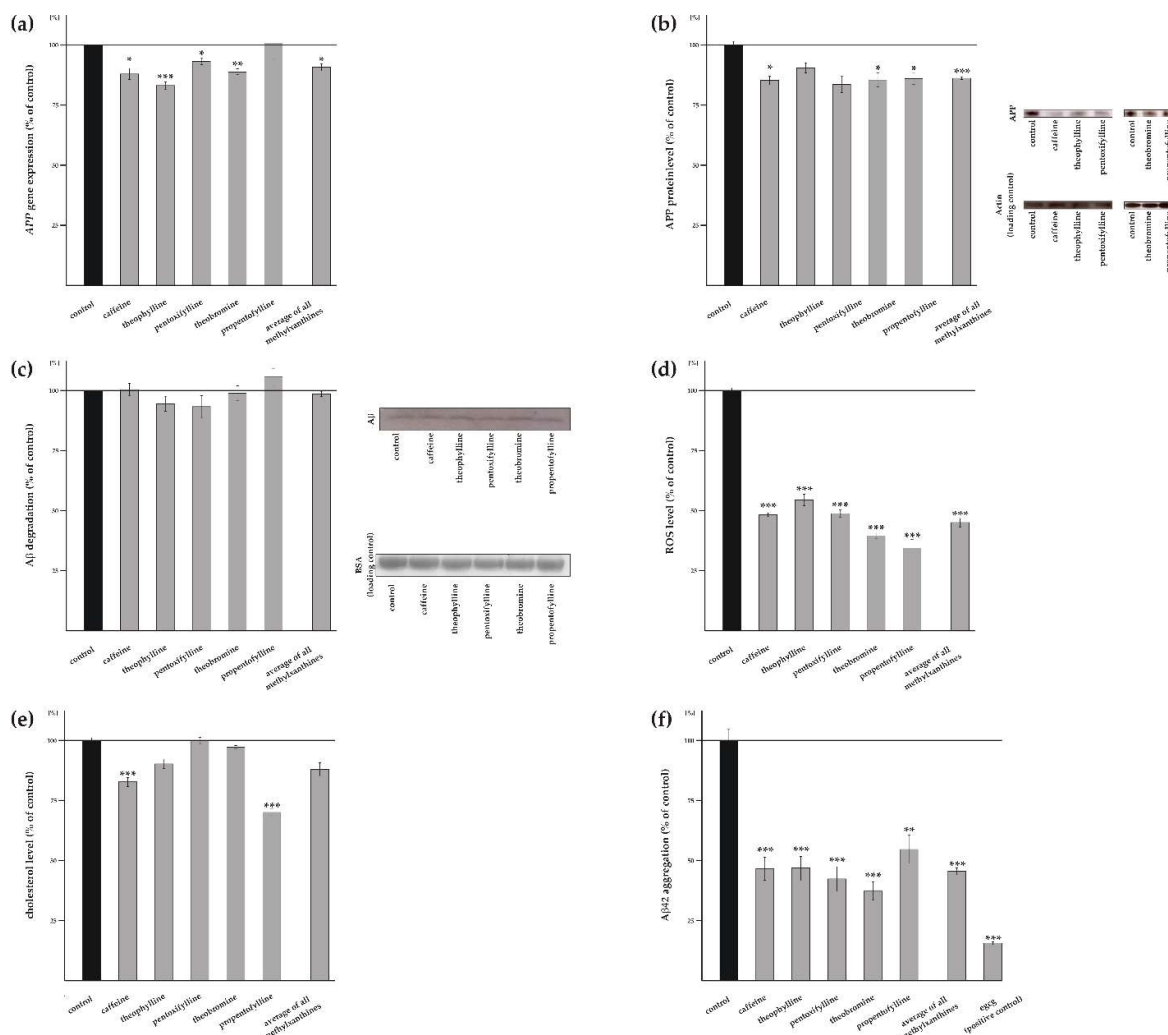

**Supplemental Figure 4. Influence of MTXs on APP level, A $\beta$  catabolism and aggregation, reactive oxygen species and cholesterol.** (a) Gene expression of APP ( $n \geq 10$ ). (b) APP protein level in lysates of treated SH-SY5Y cells ( $n \geq 6$ ). Representative WBs including load control are shown on the right. (c) Influence of MTXs on ROS level in human neuroblastoma cells ( $n \geq 8$ ). (d) A $\beta$  degradation in the presence of MTXs ( $n \geq 11$ ). Representative WBs including load control are shown on the right. (e) Effect of MTXs on cholesterol level ( $n \geq 4$ ). (f) Influence of MTXs on A $\beta$ 42 aggregation ( $n \geq 20$ ). Epigallocatechin gallate (EGCG) served as positive control. Error bars represent the standard error of the mean. Asterisks show the statistical significance calculated by unpaired Student's t test (\*  $p \leq .05$ ; \*\*  $p \leq .01$ ; \*\*\*  $p \leq .001$ ).
